Anesthesiology  
60:609, 1984

### An Adjustable Laryngoscope Handle for Difficult Intubations

*To the Editor:*—Direct laryngoscopy is at best difficult and may be impossible in massively obese patients and those in halo traction. Fracture or instability of the cervical spine may preclude extension of the neck, which usually facilitates visualization of the larynx. Use of a short (Bantam) handle overcomes the problem in some patients. As a further refinement, an adjustable angle laryngoscope has been designed.\* A blade lock (arrow) allows positioning of the blade at 180, 135, 90, or 45 degrees to the handle. When the handle impinges on the patient's chest, the blade is positioned and introduced parallel to the handle (fig. 1). The angle then is changed to 135 degrees or 90 degrees, the tongue retracted, and laryngoscopy performed. The barrel of the handle contains two AA batteries and is 8 cm in length. The overall length and weight of the handle and blade lock mechanism is approximately the same as conventional handles containing two C batteries.

VIJAYALAKSHMI U. PATIL, M.D.  
*Assistant Professor, Department of Anesthesiology*

LINDA C. STEHLING, M.D.  
*Professor, Departments of Anesthesiology and Pediatrics*

HOWARD L. ZAUDER, M.D.  
*Professor and Chairman, Department of Anesthesiology  
Professor of Pharmacology  
State University of New York  
Upstate Medical Center  
Syracuse, New York 13210*

(Accepted for publication December 15, 1983.)

\* Available from Anesthesia Associates, San Marcos, California.

FIG. 1. Adjustable laryngoscope handle. Blade lock (arrow) allows positioning of the blade.

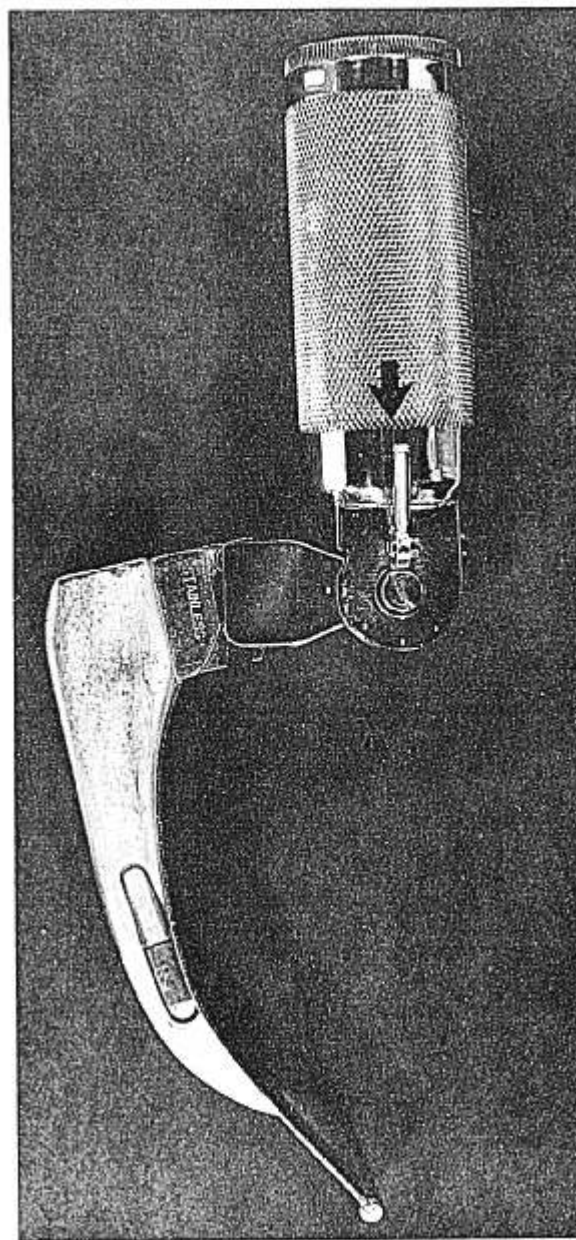

Downloaded from <http://aas2.silverchair.com/anesthesiology/article-pdf/60/6/609/308526/0000542-198406000-00025.pdf> by guest on 10 April 2024

Anesthesiology  
60:609-610, 1984

### Tension Pneumocephalus and Intermittent Drainage of Ventricular CSF

*To the Editor:*—Tension pneumocephalus already has received more than a fair share of attention in recent issues of ANESTHESIOLOGY.<sup>1-3</sup> However, I raise the sub-

ject again because of a clinical trap that I would like to describe, lest others fall in after me. A 39-year-old man with a 3-year history of unilateral hearing loss and head-
